# Supplementary material for: Promotional effect of niobium substitution on the low-temperature activity of a WO3/CeZrOxmonolithic catalyst for the selective catalytic reduction of NOxwith NH3
Source: Royal Society of Chemistry journal article supplement (doi:10.1039/c7ra08429c), 2017-01-01
Supplement: c7ra08429c1.pdf [file c7ra08429c1.pdf]

**Promotional effect of niobium substitution on the low-temperature activity of  
WO<sub>3</sub>/CeZrO<sub>x</sub> monolithic catalyst for the selective catalytic reduction of NO<sub>x</sub> with  
NH<sub>3</sub>**

Haidi Xu<sup>a</sup>, Qingjin Lin<sup>b</sup>, Yun Wang<sup>c</sup>, Li Lan<sup>d</sup>, Shuang Liu<sup>a</sup>, Chenlu Lin<sup>a</sup>, Qin Wang<sup>c</sup>,  
Jianli Wang<sup>\*b</sup>, Yaoiqng Chen<sup>\*a,b</sup>

<sup>a</sup> Institute of New Energy and Low-Carbon Technology, Sichuan University, Chengdu  
610064, PR China

<sup>b</sup> College of Chemistry, Sichuan University, Chengdu 610064, PR China

<sup>c</sup> Sinocat Environmental Technology Co., Ltd, Chengdu 611731, PR China

<sup>d</sup> College of Pharmacy and Biological Engineering, Chengdu University, Chengdu  
610106, PR China

\* Corresponding author. Tel/Fax: +86-28-85418451.

E-mail address: [nic7501@scu.edu.cn](mailto:nic7501@scu.edu.cn) (Y. Chen) and [wangjianli@scu.edu.cn](mailto:wangjianli@scu.edu.cn) (J.  
Wang).

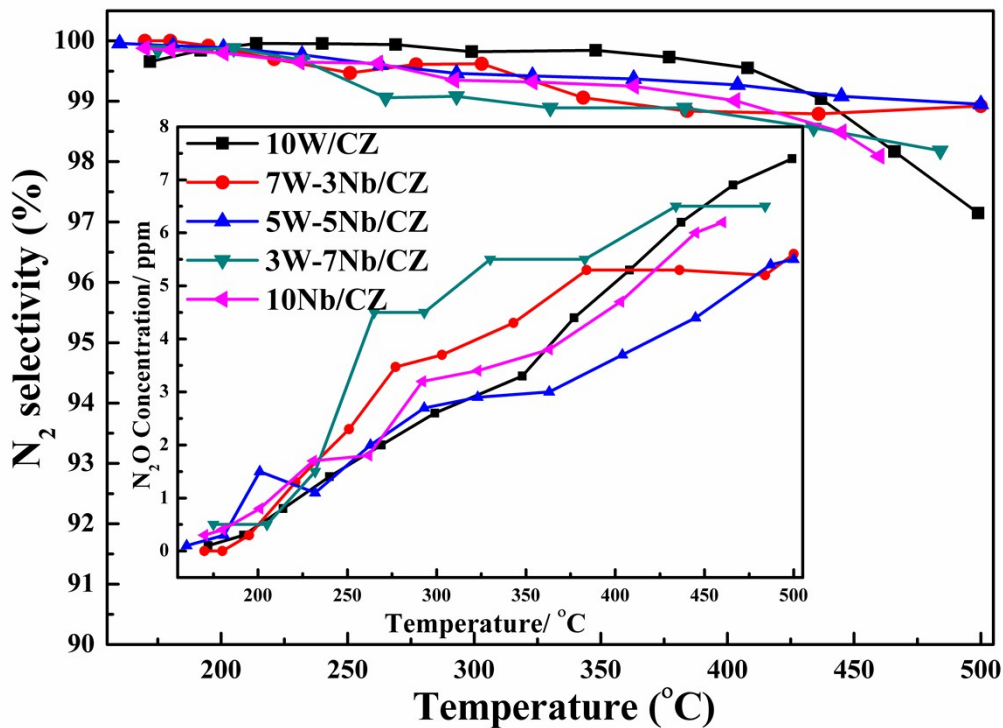

Fig. S1. N<sub>2</sub> selectivity of 10W/CZ, Nb-substituted W/CZ and 10Nb/CZ catalysts in NH<sub>3</sub>-SCR reaction. Reaction conditions: 500 ppm NO, 500 ppm NH<sub>3</sub>, 5% O<sub>2</sub> and N<sub>2</sub> as balance gas, the total gas rate: 1.25 L·min<sup>-1</sup>, GHSV: 30000 h<sup>-1</sup>.

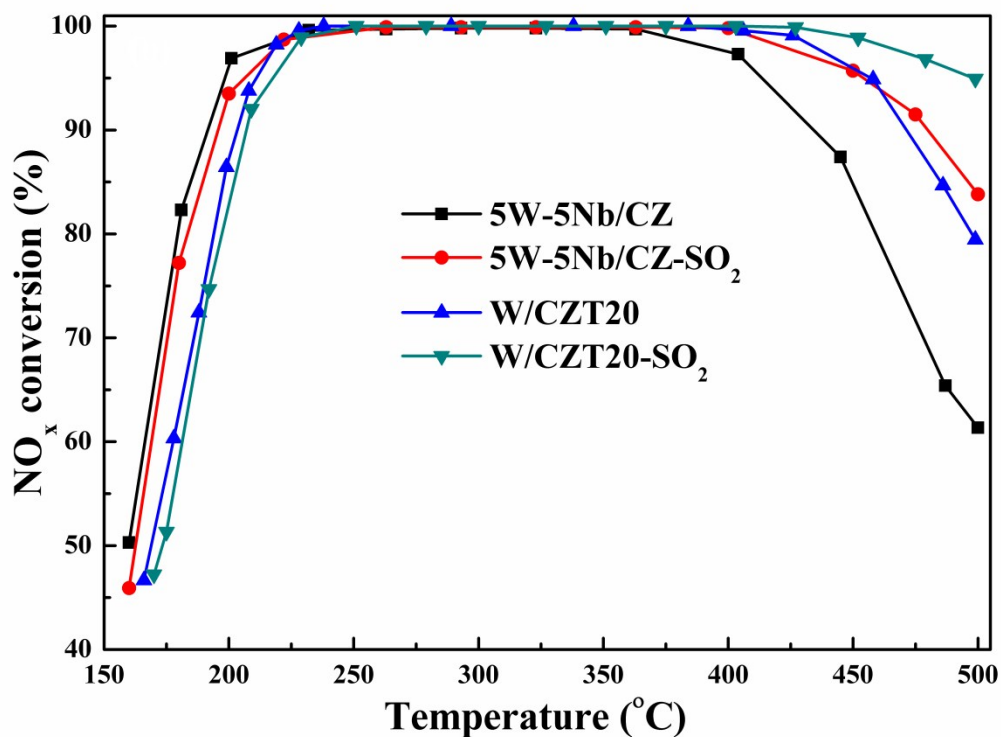

Fig.S2. Comparison of NO<sub>x</sub> conversion before and after introducing SO<sub>2</sub> over 5W-5Nb/CZ and W/CZT20 catalysts (b). Reaction conditions: 500 ppm NO, 500 ppm NH<sub>3</sub>, 5% O<sub>2</sub>, 100 ppm SO<sub>2</sub> (when used) and N<sub>2</sub> as balance gas, the total gas rate: 1.25 L·min<sup>-1</sup>, GHSV: 30000 h<sup>-1</sup>.

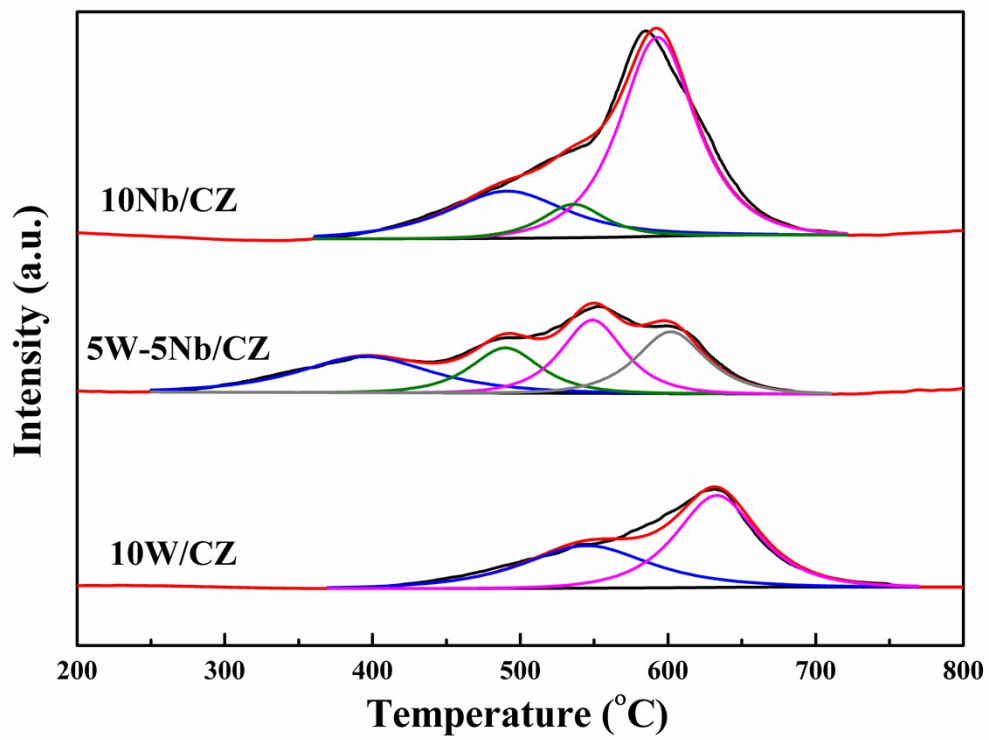

Fig. S3. H<sub>2</sub>-TPR profiles after deconvolution of 10W/CZ, 5W-5Nb/CZ and 10Nb/CZ.
